# Supplementary material for: Antipsychotic-Related DRESS Syndrome: Analysis of Individual Case Safety Reports of the WHO Pharmacovigilance Database
Source: PubMed Central journal article supplement — Drug Saf. 2024 May 9;47(8):745–57. doi: 10.1007/s40264-024-01431-7 (PMC11286650; doi:10.1007/s40264-024-01431-7), 2024-05-09
Supplement: 40264_2024_1431_MOESM1_ESM.pdf [file 40264_2024_1431_MOESM1_ESM.pdf]

**Antipsychotic-related DRESS syndrome:**

**analysis of individual case safety reports of the WHO pharmacovigilance database**

**Running title:** Antipsychotic-related DRESS in VigiBase®

Renato **de Filippis**<sup>1,\*</sup>, John M. **Kane**<sup>2,3,4</sup>, Elena **Arzenton**<sup>5</sup>, Ugo **Moretti**<sup>5</sup>, Emanuel **Raschi**<sup>6</sup>, Gianluca **Trifirò**<sup>5</sup>, Corrado **Barbui**<sup>7</sup>, Pasquale **De Fazio**<sup>1</sup>, Chiara **Gastaldon**<sup>7,8,§</sup>, Georgios **Schoretsanitis**<sup>2,3,9, §</sup>

<sup>1</sup>Psychiatry Unit, Department of Health Sciences, University Magna Graecia of Catanzaro, Catanzaro, 88100, Italy

<sup>2</sup>The Zucker Hillside Hospital, Psychiatry Research, Northwell Health, Glen Oaks, New York, USA

<sup>3</sup>Department of Psychiatry, Zucker School of Medicine at Northwell/Hofstra, Hempstead, NY, USA

<sup>4</sup>Center for Psychiatric Neuroscience, Feinstein Institute for Medical Research, Manhasset, NY, USA

<sup>5</sup>Section of Pharmacology, Department of Diagnostics and Public Health, University of Verona, Verona, Italy

<sup>6</sup>Pharmacology Unit, Department of Medical and Surgical Sciences, University of Bologna, Bologna, Italy

<sup>7</sup>WHO Collaborating Centre for Research and Training in Mental Health and Service Evaluation, Department of Neuroscience, Biomedicine and Movement Sciences, Section of Psychiatry, University of Verona, Piazzale L.A. Scuro, 10, 37134 Verona, Italy

<sup>8</sup>Institute of Social and Preventive Medicine, University of Bern, Bern, Switzerland

<sup>9</sup>Department of Psychiatry, Psychotherapy and Psychosomatics, Hospital of Psychiatry, University of Zurich, Zurich, Switzerland

<sup>§</sup>contributed equally.

**\*Corresponding author:**

Renato de Filippis, MD, PhD  
Psychiatry Unit, Dept. Health Sciences  
University Magna Graecia of Catanzaro, Italy

Work Phone: +39 0961 712803

Fax: +39 0961 712393

Email: [rdefilippis@unicz.it](mailto:rdefilippis@unicz.it)

ORCID: <https://orcid.org/0000-0001-6928-1224>

X: @rdefilippis1

**The number of tables, figures, and references, the number of words in the Abstract and Manuscript and the number of supplementary figures and tables**

number of words in the abstract: 250/250 (including headings)

number of key points: 3/3

number of words in the manuscript: (excluding tables and legends to figures): 3,787/6,000

number of figures: 1

number of tables: 4

number of references: 85

number of supplementary tables: 4

## Electronic Supplementary Material

**Supplementary Table 1.** List of all 82 typical and atypical antipsychotic agents according to the WHO Anatomical Therapeutic Chemical (ATC) index included in the analysis.

|                                |                                                                                                                                                                                                                                                                                                                                                                                                                                                                                                                                                                                                                                                                                               |
|--------------------------------|-----------------------------------------------------------------------------------------------------------------------------------------------------------------------------------------------------------------------------------------------------------------------------------------------------------------------------------------------------------------------------------------------------------------------------------------------------------------------------------------------------------------------------------------------------------------------------------------------------------------------------------------------------------------------------------------------|
| <b>Typical antipsychotics</b>  | acepromazine, acetophenazine, benperidol, bromperidol, butaperazine, carfenazine, chlorproethazine, chlorpromazine, chlorprothixene, clopenthixol, cyamemazine, dixyrazine, droperidol, fluanisone, flupentixol, fluphenazine, fluspirilene, haloperidol, levomepromazine, lenperone, loxapine, mesoridazine, metitepine, molindone, moperone, oxypertine, oxyprothepine, penfluridol, perazine, periciazine, perphenazine, pimozide, pipamperone, piperacetazine, pipotiazine, prochlorperazine, promazine, prothipendyl, spiperone, sulforidazine, thiopropazate, thioproperazine, thioridazine, thiothixene, timiperone, trifluoperazine, trifluoperidol, triflupromazine, zuclopenthixol. |
| <b>Atypical antipsychotics</b> | amoxapine, amisulpride, aripiprazole, asenapine, blonanserin, brexpiprazole, cariprazine, caripramine, clocapramine, clorotepine, clotiapine, clozapine, iloperidone, levosulpiride, lumateperone, lurasidone, melperone, mosapramine, nemonapride, olanzapine, paliperidone, perospirone, quetiapine, remoxipride, reserpine, risperidone, sertindole, sulpiride, sultopride, tiapride, veralipride, ziprasidone, zotepine.                                                                                                                                                                                                                                                                  |

**Supplementary Table 2.** Criteria for the classification and prioritization of relevant disproportionate reporting.

| Clinical priority features for each drug                                                                                                                            | 2 points                                     | 1 point                                | 0 point                             |
|---------------------------------------------------------------------------------------------------------------------------------------------------------------------|----------------------------------------------|----------------------------------------|-------------------------------------|
| Number of cases of DRESS syndrome/Total number of reports of any AE*                                                                                                | >0.4%                                        | 0.1-0.4%                               | <0.1%:                              |
| Number of cases of DRESS syndrome without confounders**/number of all cases of DRESS                                                                                | >10%                                         | 10-1%                                  | <1%                                 |
| Significant ROR and IC values consistent across different analyses<br><br>(in the main analysis, in the intraclass analysis and with carbamazepine as a comparator) | ROR and IC significant in all three analyses | ROR and IC significant in two analyses | ROR and IC significant one analysis |
| Magnitude of the lower limit of the 95% CI of the ROR                                                                                                               | NA                                           | >1                                     | 0-1                                 |

AEs: adverse events; DRESS: drug reaction with eosinophilia and systemic symptoms; IC: information component; NA: Not applicable; ROR: reporting odds ratio.

\*This criterion has been adapted as this is a rare AE.

\*\* Cases with confounders were cases in which other drugs known to have the potential to cause DRESS were co-prescribed. Drugs considered included: Amoxicillin, Allopurinol, Azithromycin, Carbamazepine, Ceftriaxone, Dapsone, Ibuprofen, Lamotrigine, Levetiracetam, Minocycline, Phenobarbital, Phenytoin, Piperacillin, Rifampicin, Ramipril, Sulfamethoxazole, Sulfasalazine, Tazobactam, Topiramate, Trimethoprim, Vancomycin, Valproate.

**Supplementary Table 3.** Reporting odds ratios (RORs) and 95% confidence intervals (CI) for each antipsychotic (ROR > 1 indicates an increased DRESS syndrome reporting associated with antipsychotics) – antipsychotics intraclass comparison.

| Medication                     | n DRESS | n ADR   | ROR   | Lower 95% ROR | Higher 95% ROR | IC    | Lower 95% IC | Higher 95% IC |
|--------------------------------|---------|---------|-------|---------------|----------------|-------|--------------|---------------|
| <b>Typical Antipsychotics</b>  |         |         |       |               |                |       |              |               |
| Haloperidol                    | 57      | 35,870  | 0.88  | 0.64          | 1.21           | 0.32  | -0.12        | 0.64          |
| Chlorpromazine                 | 37      | 12,636  | 1.89* | 1.31          | 2.72           | 0.92* | 0.37         | 1.31          |
| Cyamemazine                    | 23      | 5,188   | 2.82* | 1.82          | 4.37           | 1.38* | 0.68         | 1.87          |
| Levomepromazine                | 13      | 5,368   | 1.44  | 0.82          | 2.53           | 0.54  | -0.40        | 1.18          |
| Loxapine                       | 11      | 3,775   | 1.74  | 0.94          | 3.20           | 0.76  | -0.26        | 1.45          |
| Zuclopenthixol                 | 11      | 4,359   | 1.50  | 0.81          | 2.76           | 0.58  | -0.44        | 1.27          |
| Perphenazine                   | 6       | 3,323   | 1.05  | 0.46          | 2.37           | 0.10  | -1.32        | 1.01          |
| Droperidol                     | 5       | 2,197   | 1.33  | 0.55          | 3.24           | 0.39  | -1.17        | 1.37          |
| <b>Atypical Antipsychotics</b> |         |         |       |               |                |       |              |               |
| Clozapine                      | 800     | 184,094 | 4.23* | 3.76          | 4.76           | 1.47* | 1.35         | 1.55          |
| Olanzapine                     | 152     | 71,859  | 1.03  | 0.87          | 1.22           | 0.21  | -0.06        | 0.40          |
| Quetiapine                     | 134     | 87,822  | 0.71  | 0.59          | 0.85           | -0.23 | -0.52        | -0.02         |
| Risperidone                    | 89      | 114,334 | 0.33  | 0.27          | 0.41           | -1.14 | -1.49        | -0.89         |
| Aripiprazole                   | 61      | 70,082  | 0.39  | 0.30          | 0.51           | -1.07 | -1.49        | -0.76         |
| Lurasidone                     | 23      | 13,145  | 0.85  | 0.56          | 1.28           | -0.20 | -0.90        | 0.29          |
| Ziprasidone                    | 23      | 14,911  | 0.75  | 0.49          | 1.13           | -0.37 | -1.07        | 0.12          |
| Amisulpride                    | 16      | 7,725   | 1.01  | 0.62          | 1.65           | 0.03  | -0.81        | 0.61          |
| Paliperidone                   | 12      | 47,633  | 0.11  | 0.06          | 0.20           | -2.87 | -3.85        | -2.20         |
| Sulpiride                      | 7       | 4,861   | 0.70  | 0.33          | 1.47           | -0.47 | -1.77        | 0.38          |
| Tiapride                       | 7       | 1,922   | 1.78  | 0.85          | 3.75           | 0.76  | -0.54        | 1.61          |

ADR: Adverse drug reaction; DRESS: Drug reaction with eosinophilia and systemic symptoms; n: number. \*significant

**Supplementary Table 4.** Clinical classification and prioritization of relevant disproportionate reporting.

| Drug           | n cases | CRITERION 1           |       | CRITERION 2                                      |       | CRITERION 3                  |            |                   |       | CRITERION 4                  |       | TOTAL SCORE | Priority level |
|----------------|---------|-----------------------|-------|--------------------------------------------------|-------|------------------------------|------------|-------------------|-------|------------------------------|-------|-------------|----------------|
|                |         | n cases / total n AEs | SCORE | n cases without confounders/ total n cases DRESS | SCORE | Significance across analyses |            |                   | SCORE | Magnitude of ROR lower 95%CI | SCORE |             |                |
|                |         |                       |       |                                                  |       | Main                         | Intraclass | vs. carbamazepine |       |                              |       |             |                |
| Clozapine      | 800     | 0.43%                 | 2     | 58.99%                                           | 2     | yes                          | yes        | no                | 1     | 2.1                          | 1     | 6           |                |
| Chlorpromazine | 37      | 0.29%                 | 1     | 2.73%                                            | 1     | yes                          | yes        | no                | 1     | 1.1                          | 1     | 4           |                |
| Cyamemazine    | 23      | 0.44%                 | 2     | 1.70%                                            | 1     | yes                          | yes        | no                | 1     | 1.5                          | 1     | 5           |                |

Red: strong association with DRESS syndrome ( $\geq 4$  points); yellow: moderate association with DRESS syndrome (2-3 points); green: weak association with DRESS syndrome (0-1 points).

AEs: adverse events; CI: confidence interval; n cases: number of cases of DRESS syndrome; total n AEs: number of all adverse events; ROR: reporting odds ratio.
